# Supplementary material for: Nanoarchitectonics of a Microsphere-Based Scaffold for Modeling Neurodevelopment and Neurological Disease
Source: PubMed Central journal article supplement (PMC8865216; doi:10.1021/acsabm.1c01012), 2022-01-19
Supplement: mt1c01012_si_001.pdf [file mt1c01012_si_001.pdf]

## Supporting Information

### **Nanoarchitectonics of a Microsphere-Based Scaffold for Modeling Neurodevelopment and Neurological Disease**

Eric S. Sandhurst<sup>a,b</sup>, Sharad V. Jaswandkar<sup>c</sup>, Krishna Kundu<sup>c</sup>, Dinesh R. Katti<sup>c</sup>, Kalpana S. Katti<sup>c</sup>, Hongli Sun<sup>a,b,#</sup>, Daniel Engebretson<sup>a</sup>, Kevin R. Francis<sup>a,b,d,e\*</sup>

<sup>a</sup> Department of Biomedical Engineering, University of South Dakota, Sioux Falls, SD, 57107, USA.

<sup>b</sup> BioSystems Networks and Translational Research Center, Brookings, SD, 57006, USA.

<sup>c</sup> Civil, Construction and Environmental Engineering Department, North Dakota State University, Fargo, ND, 58108, USA.

<sup>d</sup> Cellular Therapies and Stem Cell Biology Group, Sanford Research, Sioux Falls, SD, 57104, USA.

<sup>e</sup> Department of Pediatrics, University of South Dakota Sanford School of Medicine, Sioux Falls, SD, 57105, USA.

\* Corresponding author: K. R. F. ([kevin.francis@sanfordhealth.org](mailto:kevin.francis@sanfordhealth.org))

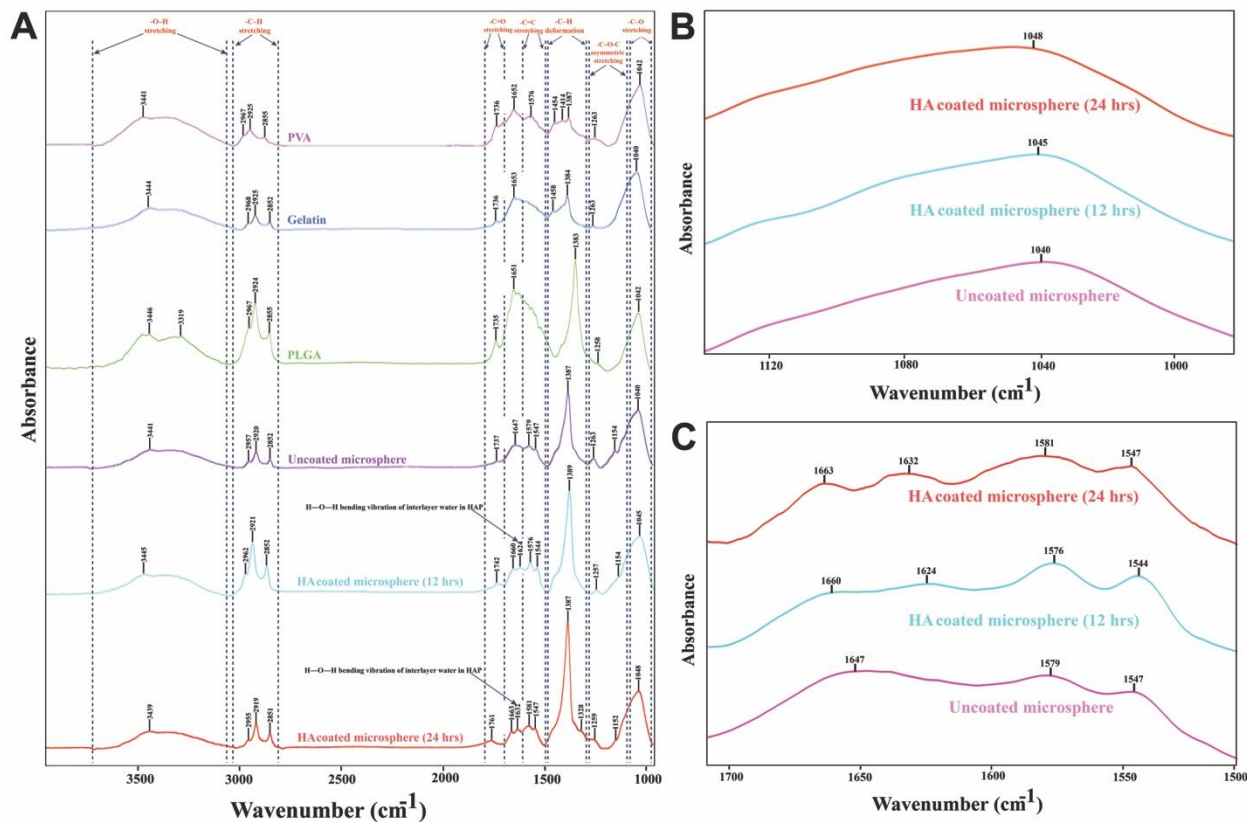

**Figure S1. FTIR analysis of the microsphere chemical structure.** (A) FTIR spectra of PVA, gelatin, PLGA, microspheres, microspheres coated with HA for 12 h, and microspheres coated with HA for 24 h. The spectra for microspheres coated with HA for 12 h exhibit -OH stretching vibrations ( $3000 - 3650 \text{ cm}^{-1}$ ), -CH, -CH<sub>2</sub>, -CH<sub>3</sub> stretching vibrations ( $2850 - 3000 \text{ cm}^{-1}$ ), carbonyl C=O stretching vibrations ( $1700 - 1750 \text{ cm}^{-1}$ ), a O-hydroxyl band due to intramolecular hydrogen bonding ( $1663 \text{ cm}^{-1}$ ), -CH deformation vibrations ( $1300 - 1500 \text{ cm}^{-1}$ ), C-O-C stretching vibrations ( $1300 - 1200 \text{ cm}^{-1}$ ) and C-O stretching vibrations ( $1045 \text{ cm}^{-1}$ ). A band shift from  $1040 \text{ cm}^{-1}$  to  $1045 \text{ cm}^{-1}$  occurred due to interaction of HA with C-O. A band at  $1624 \text{ cm}^{-1}$  due to the H—O—H bending vibration of interlayer water in HA was also observed. Microspheres coated with HA for 24 h exhibit -OH stretching vibrations ( $3000 - 3650 \text{ cm}^{-1}$ ), -CH, -CH<sub>2</sub>, -CH<sub>3</sub> stretching vibrations ( $2850 - 3000 \text{ cm}^{-1}$ ), carbonyl C=O stretching vibrations ( $1700 - 1780 \text{ cm}^{-1}$ ), intramolecular hydrogen bonding of O-hydroxyl band ( $1660 \text{ cm}^{-1}$ ), -CH deformation vibrations ( $1300 - 1500 \text{ cm}^{-1}$ ), C-O-C stretching vibrations ( $1300 - 1200 \text{ cm}^{-1}$ ) and C-O stretching vibrations ( $1048 \text{ cm}^{-1}$ )<sup>93</sup>. (B, C) Comparison of spectra between uncoated, 12 h HA coated, and 24 h HA coated microspheres. A band shift from  $1040 \text{ cm}^{-1}$  to  $1048 \text{ cm}^{-1}$  due to interaction of HA with C-O was identified. We also observed bands at  $1624 \text{ cm}^{-1}$  in 12 h coated microspheres and  $1632 \text{ cm}^{-1}$  in 24 h coated microspheres resulting from H—O—H bending vibration of interlayer water in HA.

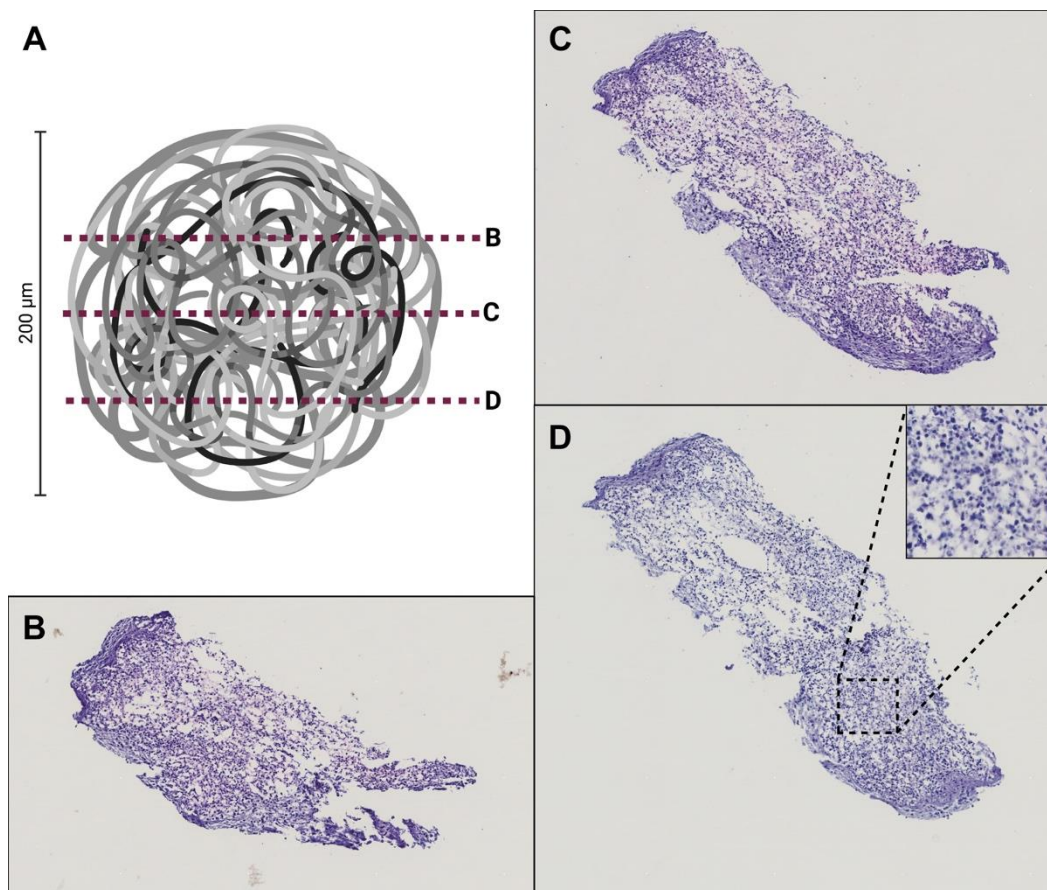

**Figure S2. Neural stem cell derivatives exhibit broad distribution within the entirety of the three-dimensional microsphere scaffold.** (A) d56 microsphere cultures (~200  $\mu\text{m}$  in diameter) were paraffin embedded, sectioned, and analyzed by H&E immunohistochemical stain for nuclear identification. (B-D) Representative H&E staining of nuclei at multiple cross-section depths within microsphere cultures. Nuclei were easily identified in cross-sections taken approximately 60  $\mu\text{m}$  (B), 110  $\mu\text{m}$  (C), and 165  $\mu\text{m}$  (D) from the surface of the scaffold. Inset in (D) demonstrates high cellularity within the internal microsphere structure.
